# Supplementary material for: Effects of changes in isotopic baselines on the evaluation of food web structure using isotopic functional indices
Source: PeerJ journal article supplement (doi:10.7717/peerj.9999), 2020-10-26

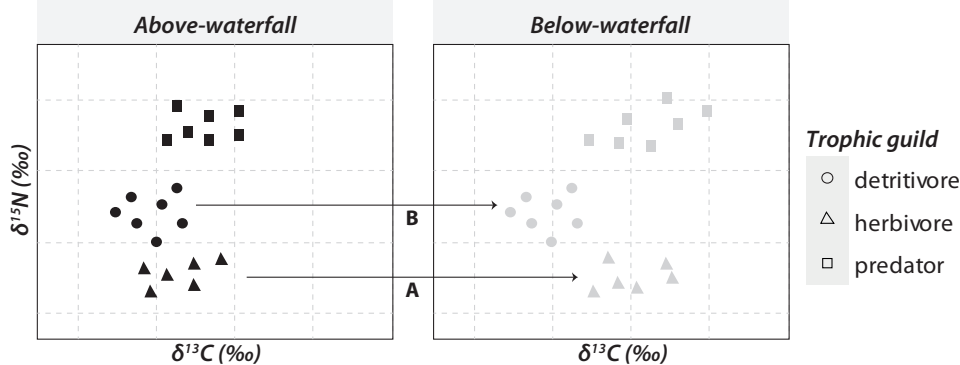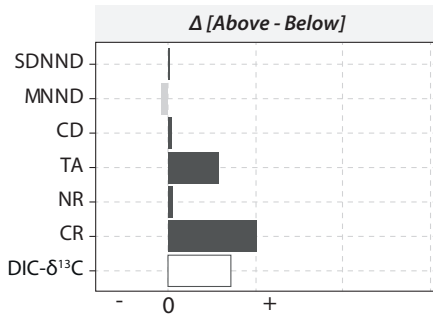

Supplement: ESM_1.pdf [file ESM_1.pdf]
